# Supplementary material for: Pivot roles of noble metal in single-phase TaXzON (0 < Z ≤ 0.001) and heterostructured Xδ/TaXz−δON (X = Pt, Ru, 0.001 < Z ≤ 0.016) visible light photocatalysts based on photoinduced interfacial charge transfer for hydrogen production
Source: Royal Society of Chemistry journal article supplement (doi:10.1039/c3ta00091e), 2013-01-01
Supplement: c3ta00091e.pdf [file c3ta00091e.pdf]

## Supporting Information

# **Pivot Roles of Noble Metal in Single-Phase $\text{TaX}_Z\text{ON}$ ( $X = \text{Pt, Ru}$ , $0 < Z < 0.001$ ) and Heterostructured $\text{X}_\delta/\text{TaX}_{Z-\delta}\text{ON}$ ( $X = \text{Pt, Ru}$ , $0.001 < Z < 0.016$ ) Visible Light Photocatalysts Based on Photoinduced Interfacial Charge Transfer for Hydrogen Production**

Zheng Wang, Jungang Hou, Chao Yang, Shuqiang Jiao, Kai Huang and Hongmin Zhu\*

*State Key Laboratory of Advanced Metallurgy,*

*School of Metallurgical and Ecological Engineering,*

*University of Science and Technology Beijing, Beijing, 100083, P. R. China*

E-mail: [hzhu@ustb.edu.cn](mailto:hzhu@ustb.edu.cn)

---

## Additional Results

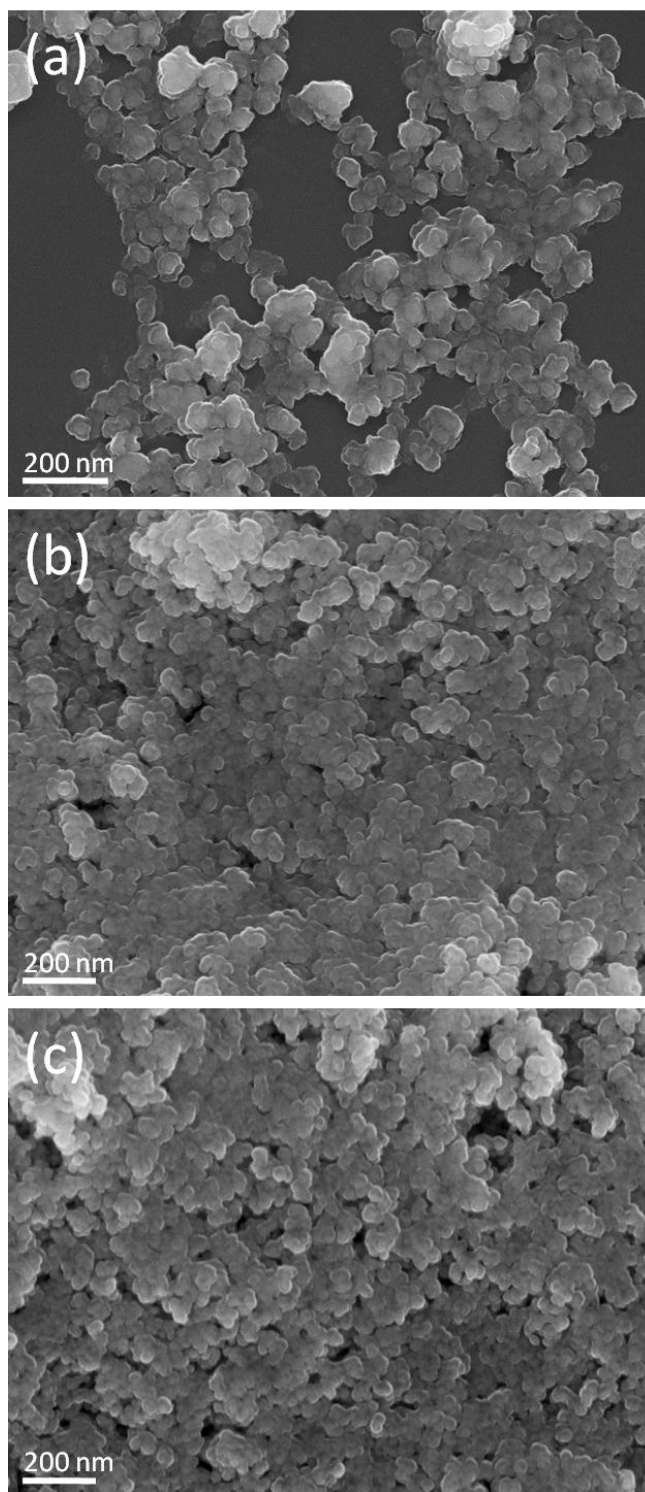

**Fig. S1.** SEM images of the photocatalysts T0 (a), PT4 (b), and RT4 (c).

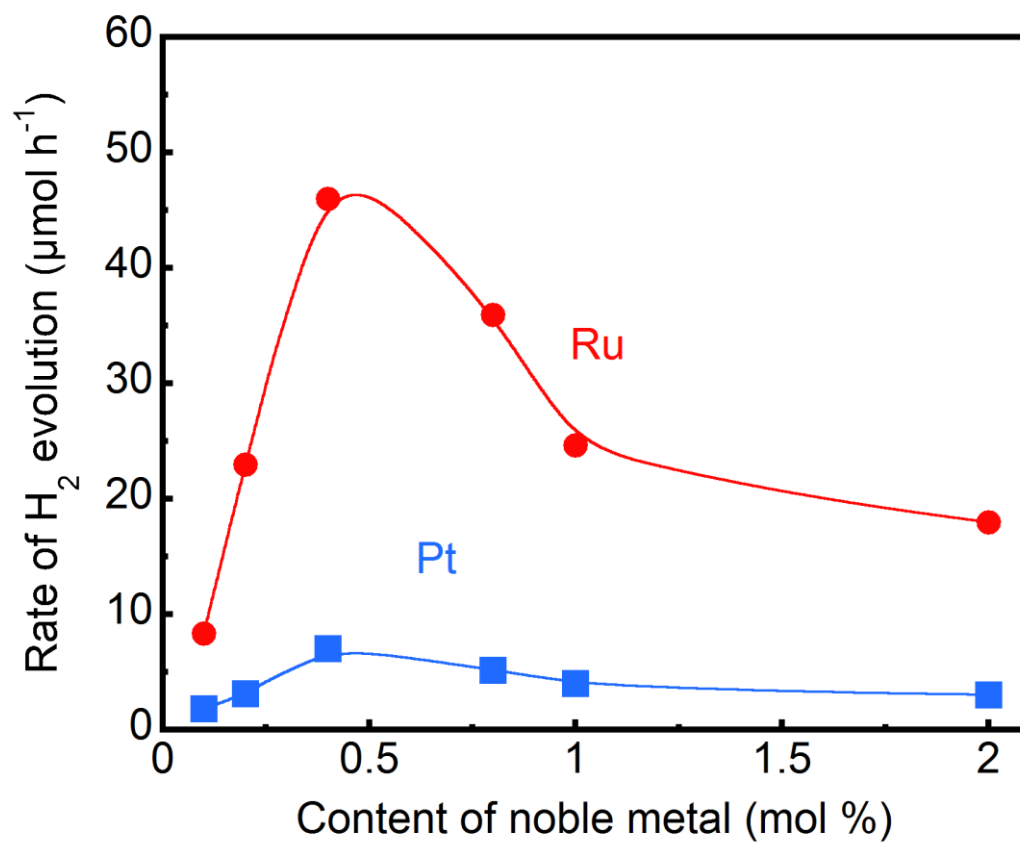

**Fig. S2.** Photocatalytic property of TaON photocatalysts with different amount of noble metal loading.
